# Supplementary material
Source: Springer Nature journal article supplement (https://www.springermedizin.de/resource/supplementary/13223_2014_512_MOESM5_ESM.pdf/9596686)

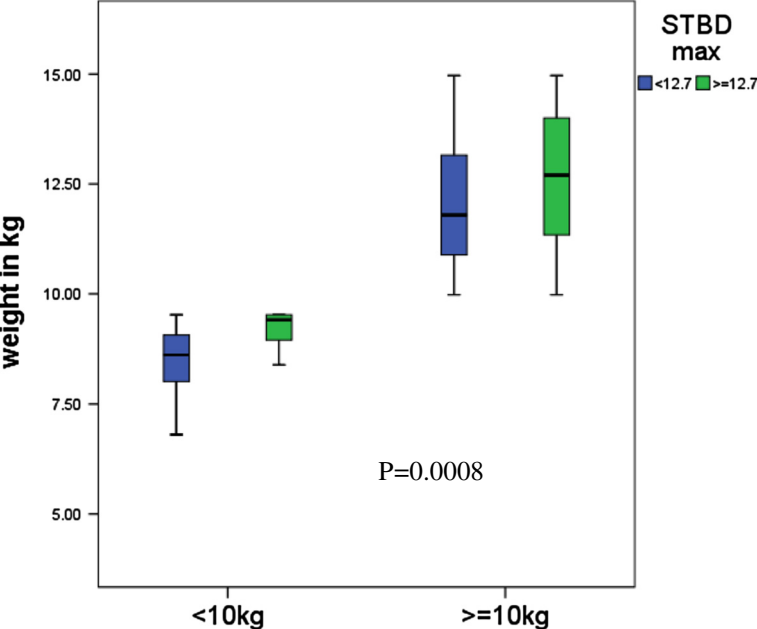

Supplement: MOESM5 [file 9596686]
